# Supplementary material for: N-Rich, Polyphenolic Porous Organic Polymer and Its In Vitro Anticancer Activity on Colorectal Cancer
Source: MDPI journal article supplement (doi:10.3390/molecules27217326), 2022-10-28
Supplement: s1 [file s1]

## Supporting Information

### N-rich, polyphenolic porous organic polymer and its *invitro* anticancer activity on colorectal cancer

*Sabuj Kanti Das,<sup>‡</sup> Snehasis Mishra<sup>‡</sup>, Krishna Das Saha, Debraj Chandra, Michikazu Hara, Amany A. Mostafa and Asim Bhaumik\**

*\*Corresponding author. E-mail: msab@iacs.res.in*

*<sup>‡</sup>These authors contributed equally.*

#### Table of Contents

**Figure S1** FTIR spectra of TrzTFPPOP after DI water, 2 (M) H<sub>2</sub>SO<sub>4</sub> and 2 (M) NaOH treatments for 7 days.

**Figure S2** Wide angle PXRD pattern of TrzTFPPOP.

**Figure S3** MTT data of (0-10 µg/ml) TrzTFPPOP against HCT 116 cell line. The IC<sub>30</sub>, IC<sub>50</sub> and IC<sub>70</sub> values are in the inset.

**Figure S4** MTT data of (0-20 µg/ml) TrzTFPPOP against HEK293 cell line

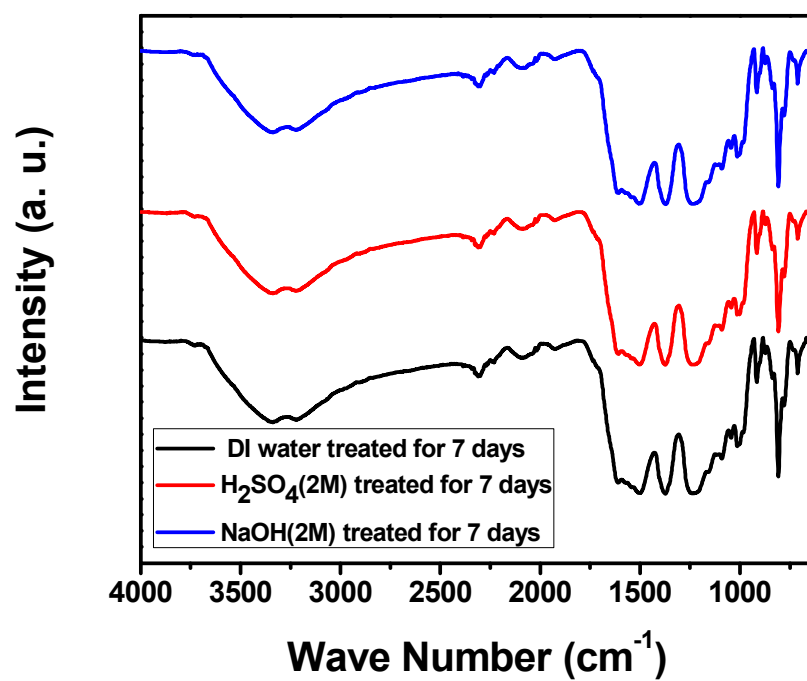

**Figure S1:** FTIR spectra of TrzTFPPOP after DI water, 2 (M) H<sub>2</sub>SO<sub>4</sub> and 2 (M)NaOH treatment for 7 days.

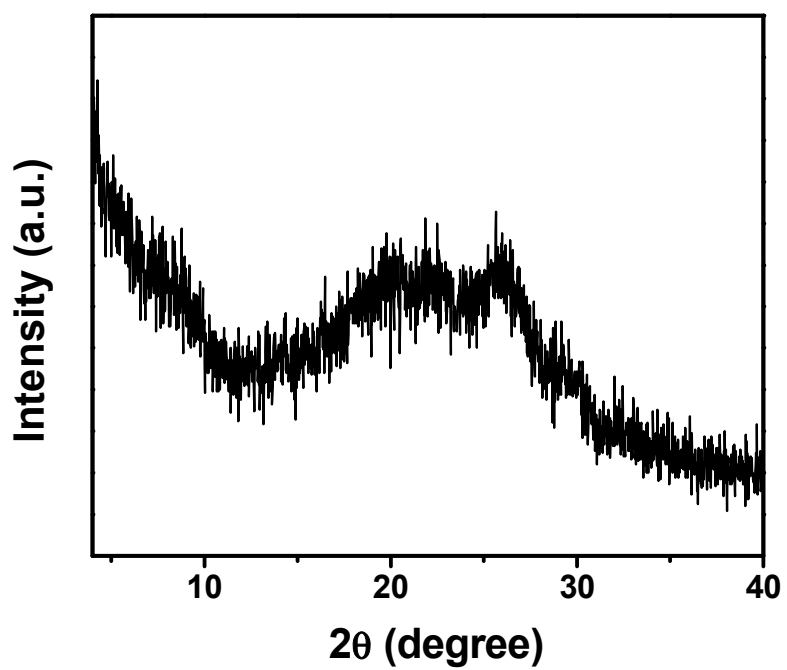

**Figure S2:** Wide angle PXRD pattern of TrzTFPPOP.

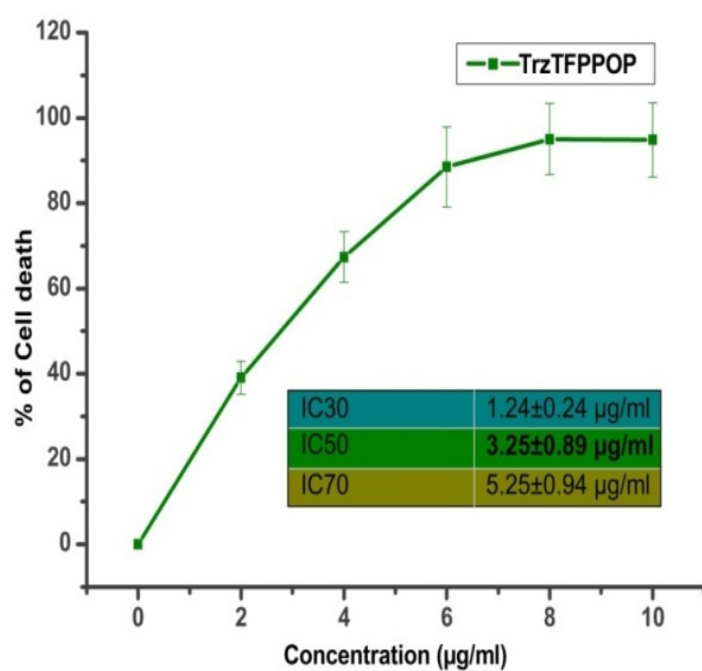

**Figure S3:** Percentage of cell death after treatment of (0-10  $\mu\text{g/ml}$ ) TrzTFPPOP. The IC<sub>30</sub>, IC<sub>50</sub> and IC<sub>70</sub> values are in the inset.

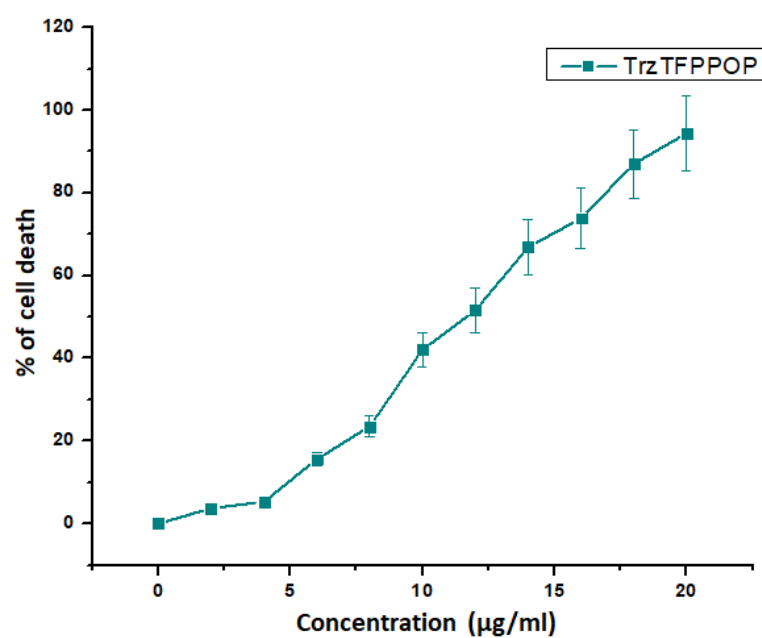

**Figure S4:** Percentage of cell death after treatment of (0-10 µg/ml) TrzTFPPOP in HEK293 cell line.
